# Supplementary material
Source: PubMed Central journal article supplement (PMC4038086)
Supplement: NIHMS518332-supplement-Supplement_Data_S2.pdf [file NIHMS518332-supplement-Supplement_Data_S2.pdf]

## DATA SUPPLEMENT 2

**Table.** Quality assessment of selected randomized trials on non-ED interventions to reduce ED use using the Grading of Recommendations Assessment, Development, and Evaluation (GRADE) criteria

| Possible limits of randomized trials                                                              |                      |                             |
|---------------------------------------------------------------------------------------------------|----------------------|-----------------------------|
| 1. Lack of allocation concealment                                                                 |                      |                             |
| 2. Lack of blinding                                                                               |                      |                             |
| 3. Incomplete accounting of patients and outcome events                                           |                      |                             |
| 4. Selective outcome reporting bias                                                               |                      |                             |
| 5. Other limitations (e.g., early termination, use of unvalidated outcomes, and recruitment bias) |                      |                             |
| First Author (reference)                                                                          | Existing limitations | Overall quality of evidence |
| Patient Education                                                                                 |                      |                             |
| Rettig (12)                                                                                       | 2, 3                 | Moderate                    |
| Rector (14)                                                                                       | 1, 3                 | Moderate                    |
| Prehospital Diversion                                                                             |                      |                             |
| Snooks (26)                                                                                       | 1, 2                 | Moderate                    |
| Managed Care                                                                                      |                      |                             |
| Schillinger (38)                                                                                  | 1, 3                 | Moderate                    |
| Patient Financial Incentives                                                                      |                      |                             |
| O'Grady (41)                                                                                      | 1,2,3,5              | Low                         |

**Table.** Quality assessment of selected observational studies on non-ED interventions to reduce ED use using the Grading of Recommendations Assessment, Development, and Evaluation (GRADE) criteria

| Possible limits of observational studies                                                                                                                                                                                                                                                                                                                                                                       |                      |                             |
|----------------------------------------------------------------------------------------------------------------------------------------------------------------------------------------------------------------------------------------------------------------------------------------------------------------------------------------------------------------------------------------------------------------|----------------------|-----------------------------|
| <ol style="list-style-type: none"> <li>1. Failure to develop and apply appropriate eligibility criteria (inclusion of control population)</li> <li>2. Flawed measurement of both exposure and outcome</li> <li>3. Failure to control confounders and to measure all known prognostic factors</li> <li>4. Imprecision of outcomes (i.e., wide confidence intervals)</li> <li>5. Incomplete follow-up</li> </ol> |                      |                             |
| First Author (reference)                                                                                                                                                                                                                                                                                                                                                                                       | Existing limitations | Overall quality of evidence |
| <b>Patient Education</b>                                                                                                                                                                                                                                                                                                                                                                                       |                      |                             |
| Glavan (10)                                                                                                                                                                                                                                                                                                                                                                                                    | 1, 3, 4              | Very low                    |
| McWilliams (11)                                                                                                                                                                                                                                                                                                                                                                                                | 1, 3                 | Very low                    |
| Schonlau (13)                                                                                                                                                                                                                                                                                                                                                                                                  | 1, 3                 | Very low                    |
| <b>Non-ED Capacity Increase</b>                                                                                                                                                                                                                                                                                                                                                                                |                      |                             |
| Chalder (22)                                                                                                                                                                                                                                                                                                                                                                                                   | 1, 2, 3              | Very low                    |
| Hsu (24)                                                                                                                                                                                                                                                                                                                                                                                                       | 1, 3, 4              | Very low                    |
| Hudec (15)                                                                                                                                                                                                                                                                                                                                                                                                     | 1, 3, 4              | Very low                    |
| O’Kelly (16)                                                                                                                                                                                                                                                                                                                                                                                                   | 1, 2, 3, 4           | Very low                    |
| Philips (23)                                                                                                                                                                                                                                                                                                                                                                                                   | 1, 2, 3              | Very low                    |
| Rust (19)                                                                                                                                                                                                                                                                                                                                                                                                      | 1, 2, 3              | Very low                    |
| Solberg (20)                                                                                                                                                                                                                                                                                                                                                                                                   | 1,2,3                | Very low                    |
| Solberg (21)                                                                                                                                                                                                                                                                                                                                                                                                   | 1,2,3,4              | Very low                    |
| van Uden (17)                                                                                                                                                                                                                                                                                                                                                                                                  | 1, 2, 3              | Very low                    |
| Wang (18)                                                                                                                                                                                                                                                                                                                                                                                                      | 2, 3                 | Very low                    |
| <b>Prehospital Diversion</b>                                                                                                                                                                                                                                                                                                                                                                                   |                      |                             |
| Schaefer (25)                                                                                                                                                                                                                                                                                                                                                                                                  | 1, 3, 5              | Very low                    |
| <b>Managed Care</b>                                                                                                                                                                                                                                                                                                                                                                                            |                      |                             |
| Badgett (27)                                                                                                                                                                                                                                                                                                                                                                                                   | 1, 3, 4              | Very low                    |
| Catalano (28)                                                                                                                                                                                                                                                                                                                                                                                                  | 1, 3                 | Very low                    |
| Catalano (29)                                                                                                                                                                                                                                                                                                                                                                                                  | 1,3, 4               | Very low                    |
| Dickey (30)                                                                                                                                                                                                                                                                                                                                                                                                    | 1, 3, 4              | Very low                    |
| Franco (31)                                                                                                                                                                                                                                                                                                                                                                                                    | 1, 2, 3              | Very low                    |
| Glazier (32)                                                                                                                                                                                                                                                                                                                                                                                                   | 1, 3                 | Very low                    |
| Hurley (33)                                                                                                                                                                                                                                                                                                                                                                                                    | 1, 2, 3, 4           | Very low                    |
| Josephson (34)                                                                                                                                                                                                                                                                                                                                                                                                 | 1,3, 4               | Very low                    |
| Murphy (35)                                                                                                                                                                                                                                                                                                                                                                                                    | 1, 3                 | Very low                    |
| Piehl (36)                                                                                                                                                                                                                                                                                                                                                                                                     | 3, 4                 | Very low                    |
| Price (37)                                                                                                                                                                                                                                                                                                                                                                                                     | 2, 4                 | Very low                    |
| <b>Patient Financial Incentives</b>                                                                                                                                                                                                                                                                                                                                                                            |                      |                             |
| Hsu (39)                                                                                                                                                                                                                                                                                                                                                                                                       | 3                    | Very low                    |
| Lowe (47)                                                                                                                                                                                                                                                                                                                                                                                                      | 1, 2, 3              | Very Low                    |
| Lowe (40)                                                                                                                                                                                                                                                                                                                                                                                                      | 2, 3                 | Very Low                    |
| Mortensen (48)                                                                                                                                                                                                                                                                                                                                                                                                 | 1, 2, 3, 5           | Very Low                    |
| Selby (42)                                                                                                                                                                                                                                                                                                                                                                                                     | 3                    | Very low                    |
| Wallace (43)                                                                                                                                                                                                                                                                                                                                                                                                   | 3                    | Very low                    |
| Waters (45)                                                                                                                                                                                                                                                                                                                                                                                                    | 2, 3,4               | Very Low                    |
| Wharam (44)                                                                                                                                                                                                                                                                                                                                                                                                    | 1,3,5                | Very Low                    |
| Wilson (46)                                                                                                                                                                                                                                                                                                                                                                                                    | 2, 3                 | Very Low                    |
