# Supplementary material
Source: PubMed Central journal article supplement (PMC4038086)

## DATA SUPPLEMENT 1

Figure 1. PRIMSA flow diagram

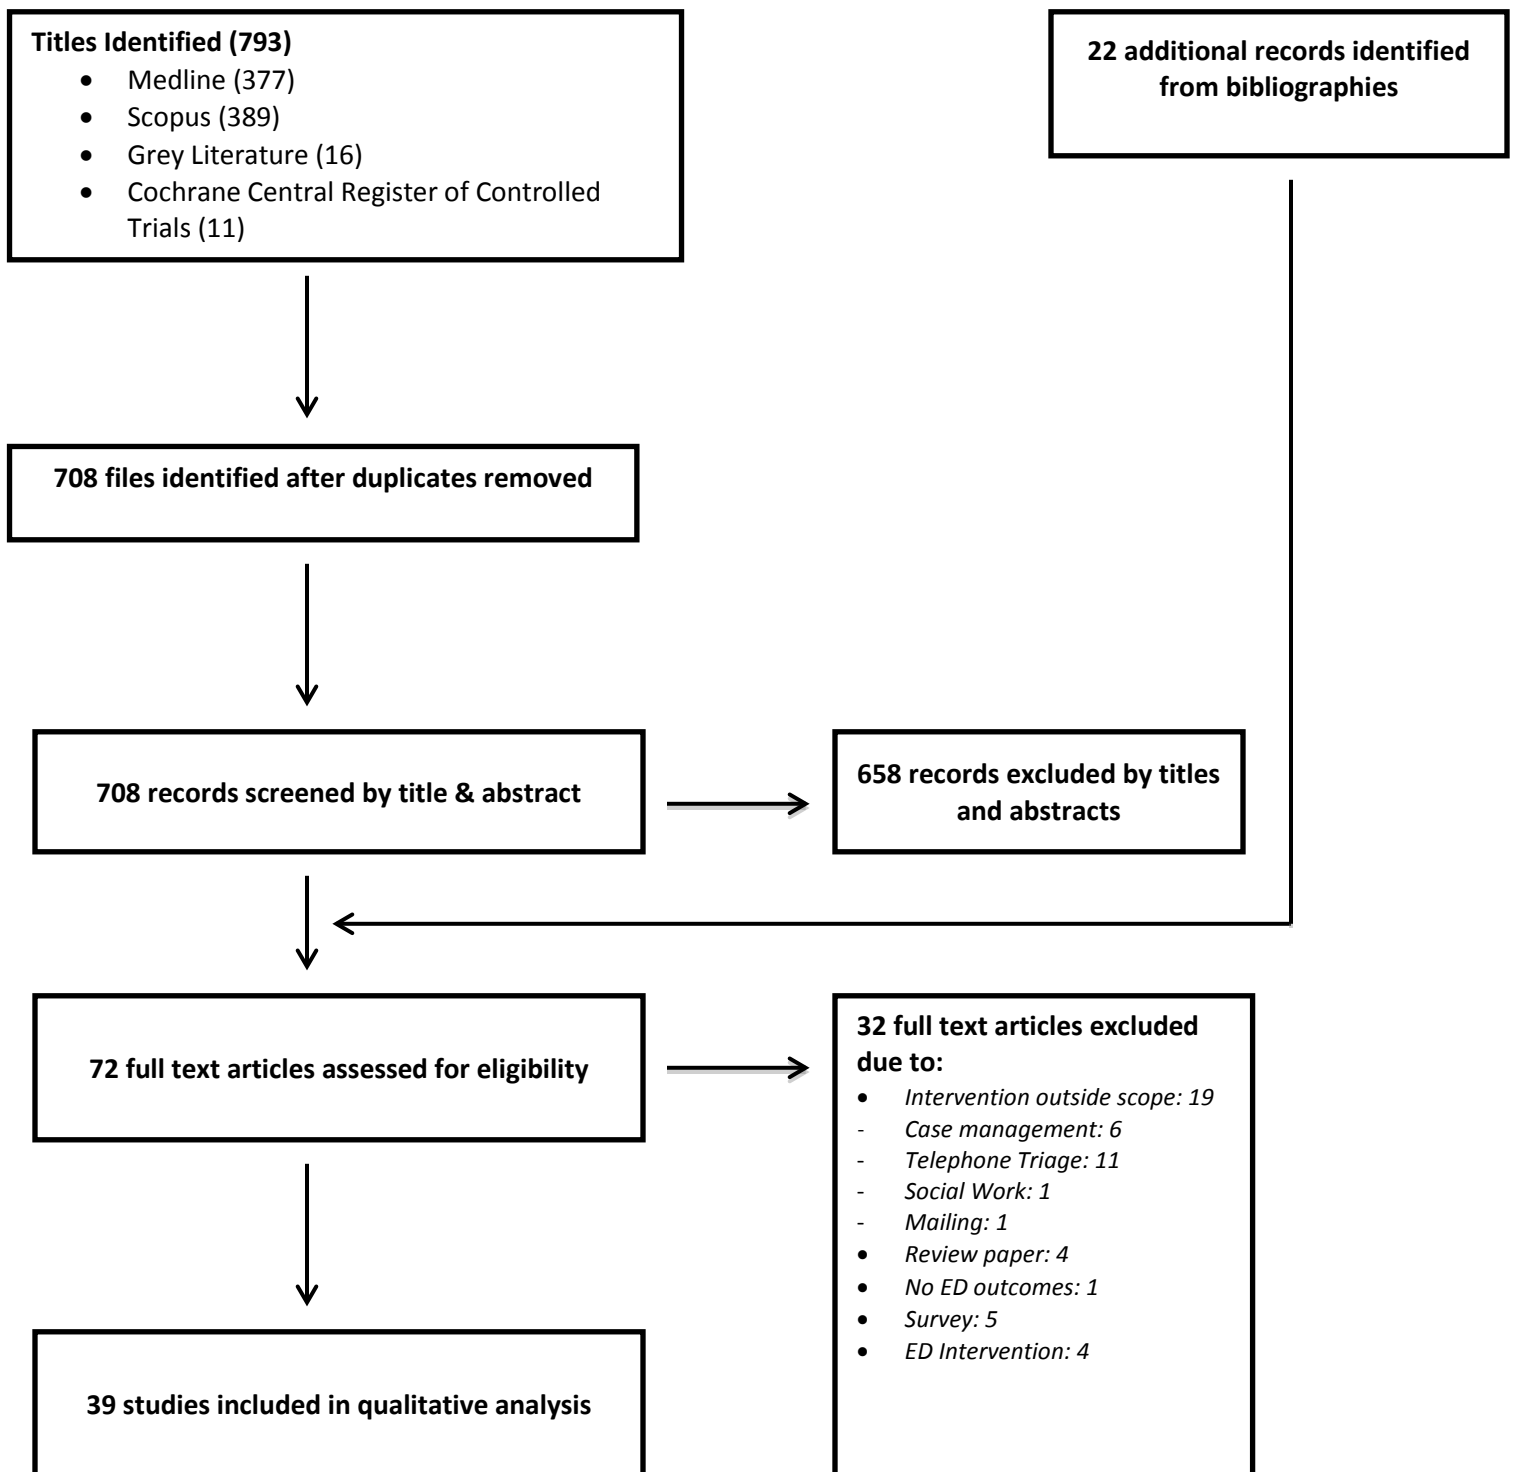

Supplement: NIHMS518332-supplement-Supplement_Data_S1.pdf [file NIHMS518332-supplement-Supplement_Data_S1.pdf]
